# Supplementary material for: Optical limiting effects of 1,10-phenanthroline functionalized heterometallic Sn–Ti oxo clusters with distinct π⋯π interactions
Source: Royal Society of Chemistry journal article supplement (doi:10.1039/d3tc04520j), 2024-01-01
Supplement: d3tc04520j1.pdf [file d3tc04520j1.pdf]

< *Electronic Supporting Information* >

## **Optical limiting effects of 1,10-phenanthroline functionalized heterometallic Sn-Ti oxo clusters with distinct $\pi \cdots \pi$ interactions**

Hui-Fang Zhao,<sup>a,b</sup> Wei-Zhou Chen,<sup>a,b</sup> San-Tai Wang,<sup>b</sup> Shumei Chen,<sup>\*a</sup> Jian Zhang<sup>b</sup> and Lei  
Zhang<sup>\*b,c</sup>

<sup>a</sup> College of Chemistry, Fuzhou University, Fuzhou, Fujian 350108, China. E-mail:

[csm@fzu.edu.cn](mailto:csm@fzu.edu.cn)

<sup>b</sup> State Key Laboratory of Structural Chemistry, Fujian Institute of Research on the Structure of  
Matter, Chinese Academy of Sciences, Fuzhou, Fujian 350002, China

<sup>c</sup> Institute of Modern Optics, College of Electronic Information and Optical Engineering, Nankai  
University, Tianjin 300350, China. E-mail: [zhanglei3915@nankai.edu.cn](mailto:zhanglei3915@nankai.edu.cn)

### **Content**

|                                                                |     |
|----------------------------------------------------------------|-----|
| 1. Single-crystal X-ray diffraction .....                      | S2  |
| 2. Bond valence sum calculations .....                         | S5  |
| 3. Additional structural pictures.....                         | S9  |
| 4. Powder-XRD patterns .....                                   | S11 |
| 5. The energy dispersive X-ray spectroscopy (EDS) spectra..... | S12 |
| 6. Thermogravimetical analysis (TG).....                       | S13 |
| 7. IR spectra.....                                             | S14 |
| 8. XPS spectra.....                                            | S15 |
| 9. The NLO Property.....                                       | S16 |

# 1. Single-crystal X-ray diffraction

**Table S1** Crystal data and structure refinement for **TOC-61**, **TOC-62** and **TOC-63**.

| Compound                                    | TOC-61                                                                                            | TOC-62                                                                                            | TOC-63                                                                                            |
|---------------------------------------------|---------------------------------------------------------------------------------------------------|---------------------------------------------------------------------------------------------------|---------------------------------------------------------------------------------------------------|
| Crystal formula                             | C <sub>130</sub> H <sub>120</sub> Cl <sub>8</sub> N <sub>18</sub> O <sub>38</sub> Sn <sub>4</sub> | C <sub>132</sub> H <sub>132</sub> Cl <sub>8</sub> N <sub>16</sub> O <sub>38</sub> Sn <sub>4</sub> | C <sub>117</sub> H <sub>123</sub> Cl <sub>9</sub> N <sub>12</sub> O <sub>53</sub> Sn <sub>7</sub> |
|                                             | Ti <sub>12</sub>                                                                                  | Ti <sub>12</sub>                                                                                  | Ti <sub>14</sub>                                                                                  |
| Formula weight                              | 3875.59                                                                                           | 3883.69                                                                                           | 4365.75                                                                                           |
| Temperature/K                               | 293(2)                                                                                            | 100.0(3)                                                                                          | 100.0(3)                                                                                          |
| Crystal system                              | triclinic                                                                                         | monoclinic                                                                                        | monoclinic                                                                                        |
| Space group                                 | P-1                                                                                               | P2/n                                                                                              | P2 <sub>1</sub> /c                                                                                |
| a/Å                                         | 15.5760(3)                                                                                        | 18.3926(3)                                                                                        | 19.2993(3)                                                                                        |
| b/Å                                         | 16.6681(3)                                                                                        | 19.1341(4)                                                                                        | 30.2530(5)                                                                                        |
| c/Å                                         | 18.5243(4)                                                                                        | 25.1686(5)                                                                                        | 30.1640(4)                                                                                        |
| α/°                                         | 105.428(2)                                                                                        | 90                                                                                                | 90                                                                                                |
| β/°                                         | 100.263(2)                                                                                        | 94.912(2)                                                                                         | 101.3500(10)                                                                                      |
| γ/°                                         | 108.298(2)                                                                                        | 90                                                                                                | 90                                                                                                |
| Volume/Å <sup>3</sup>                       | 4217.84(16)                                                                                       | 8825.0(3)                                                                                         | 17267.2(5)                                                                                        |
| Z                                           | 1                                                                                                 | 2                                                                                                 | 4                                                                                                 |
| ρ <sub>calc</sub> /cm <sup>3</sup>          | 1.526                                                                                             | 1.462                                                                                             | 1.679                                                                                             |
| μ/mm <sup>-1</sup>                          | 7.435                                                                                             | 7.105                                                                                             | 10.212                                                                                            |
| F(000)                                      | 1930.0                                                                                            | 3880                                                                                              | 8576                                                                                              |
| Crystal size/mm <sup>3</sup>                | 0.002 × 0.001 × 0.001                                                                             | 0.003 × 0.002 × 0.001                                                                             | 0.002 × 0.001 × 0.001                                                                             |
| Radiation                                   | micro-focus metaljet<br>(λ = 1.3405)                                                              | micro-focus metaljet<br>(λ = 1.3405)                                                              | micro-focus metaljet<br>(λ = 1.3405)                                                              |
| 2θ range for data collection/°              | 4.49 to 120.2                                                                                     | 4.014 to 120.35                                                                                   | 4.06 to 120.272                                                                                   |
| Index ranges                                | -17 ≤ h ≤ 20, -21 ≤ k ≤ 21, -23 ≤ l ≤ 23                                                          | -21 ≤ h ≤ 23, -24 ≤ k ≤ 24, -32 ≤ l ≤ 30                                                          | -24 ≤ h ≤ 23, -38 ≤ k ≤ 38, -35 ≤ l ≤ 38                                                          |
| Reflections collected                       | 62685                                                                                             | 67803                                                                                             | 127140                                                                                            |
| Independent reflections                     | 18752 [R <sub>int</sub> = 0.0461, R <sub>sigma</sub> = 0.0547]                                    | 19507 [R <sub>int</sub> = 0.0949, R <sub>sigma</sub> = 0.0666]                                    | 37982 [R <sub>int</sub> = 0.0928, R <sub>sigma</sub> = 0.0850]                                    |
| Data/restraints/parameters                  | 18752/42/961                                                                                      | 19507/126/953                                                                                     | 37982/2362/1923                                                                                   |
| Goodness-of-fit on F <sup>2</sup>           | 1.093                                                                                             | 1.085                                                                                             | 1.023                                                                                             |
| Final R indexes [I ≥ 2σ (I)]                | R <sub>1</sub> = 0.0636, wR <sub>2</sub> = 0.2110                                                 | R <sub>1</sub> = 0.1040, wR <sub>2</sub> = 0.2967                                                 | R <sub>1</sub> = 0.0958, wR <sub>2</sub> = 0.2397                                                 |
| Final R indexes [all data]                  | R <sub>1</sub> = 0.0758, wR <sub>2</sub> = 0.2279                                                 | R <sub>1</sub> = 0.1361, wR <sub>2</sub> = 0.3273                                                 | R <sub>1</sub> = 0.1369, wR <sub>2</sub> = 0.2688                                                 |
| Largest diff. peak/hole / e Å <sup>-3</sup> | 2.98/-1.26                                                                                        | 2.42/-1.39                                                                                        | 6.20/-1.59                                                                                        |

**Table S2** Selected bond lengths (Å) for **TOC-61**.

|         |          |                       |            |                       |          |
|---------|----------|-----------------------|------------|-----------------------|----------|
| Ti3-O20 | 1.821(4) | Ti6-O19               | 1.831(3)   | Ti7-O11               | 1.828(3) |
| Ti3-O21 | 1.832(3) | Ti6-O24               | 2.091(4)   | Ti7-O16 <sup>1</sup>  | 2.111(3) |
| Ti3-O28 | 2.124(4) | Ti6-O25               | 1.806(4)   | Ti7-O19               | 1.833(4) |
| Ti3-O29 | 1.819(4) | Ti6-O27               | 1.853(3)   | Ti7-O20               | 1.814(4) |
| Ti3-N13 | 2.232(4) | Ti6-N9                | 2.288(4)   | Ti7-N6                | 2.232(4) |
| Ti3-N16 | 2.234(5) | Ti6-N11               | 2.254(5)   | Ti7-N10               | 2.249(5) |
| Ti9-O12 | 2.033(4) | Ti10-O23              | 1.796(4)   | Ti12-O5               | 2.041(4) |
| Ti9-O21 | 1.904(4) | Ti10-O27              | 1.848(3)   | Ti12-O11 <sup>1</sup> | 1.886(3) |
| Ti9-O25 | 1.802(4) | Ti10-O29 <sup>1</sup> | 1.853(4)   | Ti12-O23              | 1.813(4) |
| Ti9-O31 | 1.845(3) | Ti10-O35              | 2.077(4)   | Ti12-O31              | 1.840(3) |
| Ti9-O32 | 2.072(4) | Ti10-N14              | 2.258(5)   | Ti12-O36              | 2.062(4) |
| Ti9-O33 | 2.091(4) | Ti10-N17              | 2.298(4)   | Ti12-O38              | 2.084(4) |
| Sn1-Cl1 | 2.474(2) | Sn3-Cl3               | 2.4814(14) |                       |          |
| Sn1-Cl4 | 2.463(2) | Sn3-O11 <sup>1</sup>  | 2.428(3)   |                       |          |
| Sn1-Cl5 | 2.470(3) | Sn3-O21               | 2.373(3)   |                       |          |
|         |          | Sn3-O31               | 2.272(3)   |                       |          |

**Table S3** Selected bond lengths (Å) for **TOC-62**.

|                      |          |                      |          |         |          |
|----------------------|----------|----------------------|----------|---------|----------|
| Ti1-O4               | 1.851(6) | Ti2-O2               | 2.059(7) | Ti3-O8  | 1.809(6) |
| Ti1-O6               | 1.879(5) | Ti2-O11              | 1.888(6) | Ti3-O11 | 1.814(7) |
| Ti1-O7               | 2.061(6) | Ti2-O12              | 1.825(6) | Ti3-O13 | 2.091(6) |
| Ti1-O8               | 1.822(6) | Ti2-O16 <sup>1</sup> | 1.874(7) | Ti3-O15 | 1.838(6) |
| Ti1-O10              | 2.055(5) | Ti2-O17              | 2.094(7) | Ti3-N2  | 2.217(9) |
| Ti1-O14              | 2.111(6) | Ti2-O11              | 2.093(7) | Ti3-N7  | 2.275(8) |
| Ti4-O19 <sup>1</sup> | 1.824(5) | Ti5-O3               | 2.090(6) | Ti6-O19 | 1.821(5) |
| Ti4-O4               | 1.859(6) | Ti5-O15              | 1.805(6) | Ti6-O6  | 1.845(6) |
| Ti4-O5               | 2.082(6) | Ti5-O16              | 1.840(7) | Ti6-O9  | 2.075(6) |
| Ti4-O12              | 1.796(6) | Ti5-O18              | 1.814(6) | Ti6-O18 | 1.815(6) |
| Ti4-N1               | 2.255(7) | Ti5-N3               | 2.260(8) | Ti6-N6  | 2.243(8) |
| Ti4-N4               | 2.244(7) | Ti5-N5               | 2.229(9) | Ti6-N8  | 2.259(7) |
| Sn1-Cl1              | 2.419(4) | Sn3-Cl5              | 2.412(4) | Sn2-Cl2 | 2.454(4) |
| Sn1-O4               | 2.477(5) | Sn3-O11              | 2.477(6) | Sn2-Cl3 | 2.479(3) |
| Sn1-O41              | 2.477(5) | Sn3-O11 <sup>1</sup> | 2.477(6) | Sn2-Cl4 | 2.450(3) |
| Sn1-O61              | 2.462(5) | Sn3-O16              | 2.469(6) |         |          |
| Sn1-O6               | 2.462(5) | Sn3-O16 <sup>1</sup> | 2.469(6) |         |          |

**Table S4** Selected bond lengths (Å) for **TOC-63**.

|          |          |          |           |          |          |
|----------|----------|----------|-----------|----------|----------|
| Ti1-O5   | 1.873(7) | Ti2-O29  | 1.864(7)  | Ti3-O3   | 2.089(8) |
| Ti1-O8   | 2.088(7) | Ti2-O34  | 1.804(8)  | Ti3-O17  | 1.827(8) |
| Ti1-O16  | 2.225(7) | Ti2-O37  | 2.085(8)  | Ti3-O24  | 1.839(7) |
| Ti1-O18  | 1.945(7) | Ti2-O40  | 1.892(7)  | Ti3-O27  | 2.097(7) |
| Ti1-O23  | 1.818(7) | Ti2-O41  | 2.165(7)  | Ti3-O30  | 2.124(7) |
| Ti1-O48  | 1.895(7) | Ti2-O52  | 2.032(7)  | Ti3-O31  | 1.871(8) |
| Ti4-O9   | 1.892(7) | Ti5-O2   | 1.805(7)  | Ti6-O10  | 2.043(7) |
| Ti4-O19  | 2.113(7) | Ti5-O7   | 1.890(8)  | Ti6-O17  | 1.797(8) |
| Ti4-O20  | 1.812(7) | Ti5-O25  | 2.086(8)  | Ti6-O46  | 1.865(7) |
| Ti4-O35  | 2.069(8) | Ti5-O47  | 1.781(7)  | Ti6-O53  | 1.814(8) |
| Ti4-O50  | 2.095(8) | Ti5-N5   | 2.245(10) | Ti6-N8   | 2.229(9) |
| Ti4-O53  | 1.826(8) | Ti5-N7   | 2.257(9)  | Ti6-N12  | 2.271(9) |
| Ti7-O29  | 1.934(6) | Ti8-O11  | 1.816(7)  | Ti9-O9   | 1.831(7) |
| Ti7-O32  | 1.924(7) | Ti8-O12  | 1.822(7)  | Ti9-O23  | 1.908(7) |
| Ti7-O39  | 2.069(8) | Ti8-O14  | 2.120(7)  | Ti9-O28  | 2.010(7) |
| Ti7-O41  | 2.316(7) | Ti8-O36  | 1.817(7)  | Ti9-O31  | 1.768(8) |
| Ti7-O43  | 1.934(7) | Ti8-N1   | 2.211(9)  | Ti9-N4   | 2.261(9) |
| Ti7-O46  | 1.748(7) | Ti8-N3   | 2.255(8)  | Ti9-N10  | 2.207(8) |
| Ti10-O2  | 1.842(7) | Ti11-O7  | 1.770(8)  | Ti12-O5  | 1.870(7) |
| Ti10-O22 | 2.043(8) | Ti11-O12 | 1.810(7)  | Ti12-O11 | 1.788(7) |
| Ti10-O24 | 1.775(8) | Ti11-O15 | 2.106(8)  | Ti12-O16 | 2.282(7) |
| Ti10-O38 | 2.090(8) | Ti11-O40 | 1.897(7)  | Ti12-O21 | 2.084(7) |
| Ti10-O48 | 1.918(7) | Ti11-N9  | 2.233(9)  | Ti12-O26 | 2.034(7) |
| Ti10-O49 | 2.098(8) | Ti11-N11 | 2.286(9)  | Ti12-O47 | 1.851(7) |
| Ti13-O1  | 1.824(7) | Ti14-O1  | 1.807(7)  | Sn1-Cl4  | 2.456(3) |
| Ti13-O20 | 1.822(7) | Ti14-O4  | 2.099(8)  | Sn1-O29  | 2.201(7) |
| Ti13-O32 | 1.887(7) | Ti14-O34 | 1.831(7)  | Sn1-O40  | 2.228(6) |
| Ti13-O33 | 2.038(8) | Ti14-O36 | 1.791(7)  |          |          |
| Ti13-O42 | 2.112(7) | Ti14-N2  | 2.230(9)  |          |          |
| Ti13-O44 | 2.150(7) | Ti14-N6  | 2.267(9)  |          |          |
| Sn2-Cl1  | 2.476(3) | Sn3-Cl2  | 2.454(5)  | Sn4-O6   | 2.186(8) |
| Sn2-O5   | 2.304(7) | Sn3-Cl3  | 2.460(5)  | Sn4-O32  | 2.181(7) |
| Sn2-O9   | 2.377(6) | Sn3-Cl7  | 2.529(6)  | Sn4-O43  | 2.092(9) |
| Sn2-O23  | 2.422(7) |          |           |          |          |
| Sn5-Cl6  | 2.464(3) | Sn6-O18  | 2.102(8)  | Sn7-Cl5  | 2.549(5) |
| Sn5-Cl8  | 2.532(4) | Sn6-O45  | 2.167(8)  | Sn7-Cl9  | 2.470(3) |
| Sn5-O18  | 2.058(7) | Sn6-O48  | 2.171(7)  | Sn7-O43  | 2.069(7) |

## 2. Bond valence sum calculations

**Table S5** Bond valence sum values for mental atoms in **TOC-61**.

|      |                  |          |       |      |                  |            |       |
|------|------------------|----------|-------|------|------------------|------------|-------|
| Ti3  | 4.244            |          |       | Ti6  | 4.156            |            |       |
| Ti3  | O20              | 1.821(4) | 0.984 | Ti6  | O19              | 1.831(3)   | 0.958 |
| Ti3  | O21              | 1.832(3) | 0.955 | Ti6  | O24              | 2.091(4)   | 0.474 |
| Ti3  | O28              | 2.124(4) | 0.434 | Ti6  | O25              | 1.806(4)   | 1.025 |
| Ti3  | O29              | 1.819(4) | 0.989 | Ti6  | O27              | 1.853(3)   | 0.902 |
| Ti3  | N13              | 2.232(4) | 0.442 | Ti6  | N9               | 2.288(4)   | 0.380 |
| Ti3  | N16              | 2.234(5) | 0.440 | Ti6  | N11              | 2.254(5)   | 0.417 |
| Ti7  | 4.234            |          |       | Ti9  | 4.272            |            |       |
| Ti7  | O11              | 1.828(3) | 0.965 | Ti9  | O12              | 2.033(4)   | 0.555 |
| Ti7  | O16 <sup>1</sup> | 2.111(3) | 0.449 | Ti9  | O21              | 1.904(4)   | 0.786 |
| Ti7  | O19              | 1.833(4) | 0.953 | Ti9  | O25              | 1.802(4)   | 1.036 |
| Ti7  | O20              | 1.814(4) | 1.003 | Ti9  | O31              | 1.845(3)   | 0.922 |
| Ti7  | N6               | 2.232(4) | 0.442 | Ti9  | O32              | 2.072(4)   | 0.499 |
| Ti7  | N10              | 2.249(5) | 0.422 | Ti9  | O33              | 2.091(4)   | 0.474 |
| Ti10 | 4.144            |          |       | Ti12 | 4.305            |            |       |
| Ti10 | O23              | 1.796(4) | 1.053 | Ti12 | O5               | 2.041(4)   | 0.543 |
| Ti10 | O27              | 1.848(3) | 0.915 | Ti12 | O11 <sup>1</sup> | 1.886(3)   | 0.825 |
| Ti10 | O29 <sup>1</sup> | 1.853(4) | 0.902 | Ti12 | O23              | 1.813(4)   | 1.005 |
| Ti10 | O35              | 2.077(4) | 0.493 | Ti12 | O31              | 1.840(3)   | 0.935 |
| Ti10 | N14              | 2.258(5) | 0.412 | Ti12 | O36              | 2.062(4)   | 0.513 |
| Ti10 | N17              | 2.298(4) | 0.370 | Ti12 | O38              | 2.084(4)   | 0.483 |
| Sn1  | 2.558            |          |       | Sn3  | 1.810            |            |       |
| Sn1  | Cl1              | 2.474(2) | 0.841 | Sn3  | Cl3              | 2.4814(14) | 0.825 |
| Sn1  | Cl4              | 2.463(2) | 0.867 | Sn3  | O11 <sup>1</sup> | 2.428(3)   | 0.267 |
| Sn1  | Cl5              | 2.470(3) | 0.850 | Sn3  | O21              | 2.373(3)   | 0.310 |
|      |                  |          |       | Sn3  | O31              | 2.272(3)   | 0.408 |

**Table S6** Bond valence sum values for bridging oxygen atoms in **TOC-61**.

|     |       |     |       |     |       |     |       |     |       |
|-----|-------|-----|-------|-----|-------|-----|-------|-----|-------|
| O11 | 2.058 | O19 | 1.910 | O20 | 1.987 | O21 | 2.052 | O23 | 2.058 |
| O25 | 2.060 | O27 | 1.817 | O29 | 1.892 | O31 | 2.264 |     |       |

**Table S7** Bond valence sum values for mental atoms in **TOC-62**.

|     |          |          |          |     |          |          |          |
|-----|----------|----------|----------|-----|----------|----------|----------|
| Ti1 | 4.216129 |          |          | Ti2 | 4.106201 |          |          |
| Ti1 | O4       | 1.851(6) | 0.907286 | Ti2 | O2       | 2.059(7) | 0.517131 |
| Ti1 | O6       | 1.879(5) | 0.84116  | Ti2 | O11      | 1.888(6) | 0.820947 |

|     |                 |          |          |     |                  |          |          |
|-----|-----------------|----------|----------|-----|------------------|----------|----------|
| Ti1 | O7              | 2.061(6) | 0.514343 | Ti2 | O12              | 1.825(6) | 0.973335 |
| Ti1 | O8              | 1.822(6) | 0.981259 | Ti2 | O16 <sup>1</sup> | 1.874(7) | 0.852605 |
| Ti1 | O10             | 2.055(5) | 0.522752 | Ti2 | O17              | 2.094(7) | 0.470455 |
| Ti1 | O14             | 2.111(6) | 0.449329 | Ti2 | O1 <sup>1</sup>  | 2.093(7) | 0.471729 |
| Ti3 | 4.287058        |          |          | Ti4 | 4.245954         |          |          |
| Ti3 | O8              | 1.809(6) | 1.016348 | Ti4 | O19 <sup>1</sup> | 1.824(5) | 0.975969 |
| Ti3 | O11             | 1.814(7) | 1.002706 | Ti4 | O4               | 1.859(6) | 0.88788  |
| Ti3 | O13             | 2.091(6) | 0.474285 | Ti4 | O5               | 2.082(6) | 0.485964 |
| Ti3 | O15             | 1.838(6) | 0.93973  | Ti4 | O12              | 1.796(6) | 1.052693 |
| Ti3 | N2              | 2.217(9) | 0.460393 | Ti4 | N1               | 2.255(7) | 0.415456 |
| Ti3 | N7              | 2.275(8) | 0.393595 | Ti4 | N4               | 2.244(7) | 0.427993 |
| Ti5 | 4.295916        |          |          | Ti6 | 4.241419         |          |          |
| Ti5 | O3              | 2.090(6) | 0.475569 | Ti6 | O19              | 1.821(5) | 0.983915 |
| Ti5 | O15             | 1.805(6) | 1.027396 | Ti6 | O6               | 1.845(6) | 0.922119 |
| Ti5 | O16             | 1.840(7) | 0.934665 | Ti6 | O9               | 2.075(6) | 0.495245 |
| Ti5 | O18             | 1.814(6) | 1.002706 | Ti6 | O18              | 1.815(6) | 1        |
| Ti5 | N3              | 2.260(8) | 0.40988  | Ti6 | N6               | 2.243(8) | 0.429151 |
| Ti5 | N5              | 2.229(9) | 0.4457   | Ti6 | N8               | 2.259(7) | 0.410989 |
| Sn1 | 1.932367        |          |          | Sn3 | 1.941863         |          |          |
| Sn1 | Cl1             | 2.419(4) | 0.975969 | Sn3 | Cl5              | 2.412(4) | 0.994609 |
| Sn1 | O4              | 2.477(5) | 0.234254 | Sn3 | O11              | 2.477(6) | 0.234254 |
| Sn1 | O4 <sup>1</sup> | 2.477(5) | 0.234254 | Sn3 | O11 <sup>1</sup> | 2.477(6) | 0.234254 |
| Sn1 | O6 <sup>1</sup> | 2.462(5) | 0.243945 | Sn3 | O16              | 2.469(6) | 0.239374 |
| Sn1 | O6              | 2.462(5) | 0.243945 | Sn3 | O16 <sup>1</sup> | 2.469(6) | 0.239374 |
| Sn2 | 2.61528         |          |          |     |                  |          |          |
| Sn2 | Cl2             | 2.454(4) | 0.88788  |     |                  |          |          |
| Sn2 | Cl3             | 2.479(3) | 0.82987  |     |                  |          |          |
| Sn2 | Cl4             | 2.450(3) | 0.897531 |     |                  |          |          |

**Table S8** Bond valence sum values for bridging oxygen atoms in **TOC-62**.

|     |       |     |       |     |       |     |       |     |       |
|-----|-------|-----|-------|-----|-------|-----|-------|-----|-------|
| O4  | 2.029 | O6  | 2.007 | O8  | 1.995 | O11 | 2.060 | O12 | 2.026 |
| O15 | 1.967 | O16 | 2.026 | O18 | 2.005 | O19 | 1.960 |     |       |

**Table S9** Bond valence sum values for metal atoms in **TOC-63**.

|     |       |          |       |     |       |          |       |
|-----|-------|----------|-------|-----|-------|----------|-------|
| Ti1 | 4.164 |          |       | Ti2 | 4.145 |          |       |
| Ti1 | O5    | 1.873(7) | 0.855 | Ti2 | O29   | 1.864(7) | 0.876 |
| Ti1 | O8    | 2.088(7) | 0.478 | Ti2 | O34   | 1.804(8) | 1.030 |
| Ti1 | O16   | 2.225(7) | 0.330 | Ti2 | O37   | 2.085(8) | 0.482 |
| Ti1 | O18   | 1.945(7) | 0.704 | Ti2 | O40   | 1.892(7) | 0.812 |

|      |       |           |       |      |       |          |       |
|------|-------|-----------|-------|------|-------|----------|-------|
| Ti1  | O23   | 1.818(7)  | 0.992 | Ti2  | O41   | 2.165(7) | 0.388 |
| Ti1  | O48   | 1.895(7)  | 0.806 | Ti2  | O52   | 2.032(7) | 0.556 |
| Ti3  | 4.142 |           |       | Ti4  | 4.210 |          |       |
| Ti3  | O3    | 2.089(8)  | 0.477 | Ti4  | O9    | 1.892(7) | 0.812 |
| Ti3  | O17   | 1.827(8)  | 0.968 | Ti4  | O19   | 2.113(7) | 0.447 |
| Ti3  | O24   | 1.839(7)  | 0.937 | Ti4  | O20   | 1.812(7) | 1.008 |
| Ti3  | O27   | 2.097(7)  | 0.467 | Ti4  | O35   | 2.069(8) | 0.503 |
| Ti3  | O30   | 2.124(7)  | 0.435 | Ti4  | O50   | 2.095(8) | 0.469 |
| Ti3  | O31   | 1.871(8)  | 0.860 | Ti4  | O53   | 1.826(8) | 0.971 |
| Ti5  | 4.261 |           |       | Ti6  | 4.310 |          |       |
| Ti5  | O2    | 1.805(7)  | 1.027 | Ti6  | O10   | 2.043(7) | 0.540 |
| Ti5  | O7    | 1.890(8)  | 0.817 | Ti6  | O17   | 1.797(8) | 1.050 |
| Ti5  | O25   | 2.086(8)  | 0.481 | Ti6  | O46   | 1.865(7) | 0.874 |
| Ti5  | O47   | 1.781(7)  | 1.096 | Ti6  | O53   | 1.814(8) | 1.003 |
| Ti5  | N5    | 2.245(10) | 0.427 | Ti6  | N8    | 2.229(9) | 0.446 |
| Ti5  | N7    | 2.257(9)  | 0.413 | Ti6  | N12   | 2.271(9) | 0.398 |
| Ti7  | 4.155 |           |       | Ti8  | 4.295 |          |       |
| Ti7  | O29   | 1.934(6)  | 0.725 | Ti8  | O11   | 1.816(7) | 0.997 |
| Ti7  | O32   | 1.924(7)  | 0.745 | Ti8  | O12   | 1.822(7) | 0.981 |
| Ti7  | O39   | 2.069(8)  | 0.503 | Ti8  | O14   | 2.120(7) | 0.439 |
| Ti7  | O41   | 2.316(7)  | 0.258 | Ti8  | O36   | 1.817(7) | 0.995 |
| Ti7  | O43   | 1.934(7)  | 0.725 | Ti8  | N1    | 2.211(9) | 0.468 |
| Ti7  | O46   | 1.748(7)  | 1.199 | Ti8  | N3    | 2.255(8) | 0.415 |
| Ti9  | 4.343 |           |       | Ti10 | 4.282 |          |       |
| Ti9  | O9    | 1.831(7)  | 0.958 | Ti10 | O2    | 1.842(7) | 0.930 |
| Ti9  | O23   | 1.908(7)  | 0.778 | Ti10 | O22   | 2.043(8) | 0.540 |
| Ti9  | O28   | 2.010(7)  | 0.590 | Ti10 | O24   | 1.775(8) | 1.114 |
| Ti9  | O31   | 1.768(8)  | 1.135 | Ti10 | O38   | 2.090(8) | 0.476 |
| Ti9  | N4    | 2.261(9)  | 0.409 | Ti10 | O48   | 1.918(7) | 0.757 |
| Ti9  | N10   | 2.207(8)  | 0.473 | Ti10 | O49   | 2.098(8) | 0.465 |
| Ti11 | 4.223 |           |       | Ti12 | 4.165 |          |       |
| Ti11 | O7    | 1.770(8)  | 1.129 | Ti12 | O5    | 1.870(7) | 0.862 |
| Ti11 | O12   | 1.810(7)  | 1.014 | Ti12 | O11   | 1.788(7) | 1.076 |
| Ti11 | O15   | 2.106(8)  | 0.455 | Ti12 | O16   | 2.282(7) | 0.283 |
| Ti11 | O40   | 1.897(7)  | 0.801 | Ti12 | O21   | 2.084(7) | 0.483 |
| Ti11 | N9    | 2.233(9)  | 0.441 | Ti12 | O26   | 2.034(7) | 0.553 |
| Ti11 | N11   | 2.286(9)  | 0.382 | Ti12 | O47   | 1.851(7) | 0.907 |
| Ti13 | 4.180 |           |       | Ti14 | 4.357 |          |       |
| Ti13 | O1    | 1.824(7)  | 0.976 | Ti14 | O1    | 1.807(7) | 1.021 |

|      |       |          |       |      |          |          |       |
|------|-------|----------|-------|------|----------|----------|-------|
| Ti13 | O20   | 1.822(7) | 0.981 | Ti14 | O4       | 2.099(8) | 0.464 |
| Ti13 | O32   | 1.887(7) | 0.823 | Ti14 | O34      | 1.831(7) | 0.958 |
| Ti13 | O33   | 2.038(8) | 0.547 | Ti14 | O36      | 1.791(7) | 1.067 |
| Ti13 | O42   | 2.112(7) | 0.448 | Ti14 | N2       | 2.230(9) | 0.444 |
| Ti13 | O44   | 2.150(7) | 0.404 | Ti14 | N6       | 2.267(9) | 0.402 |
| Sn1  | 1.836 |          |       | Sn2  | 1.789262 |          |       |
| Sn1  | Cl4   | 2.456(3) | 0.883 | Sn2  | Cl1      | 2.476(3) | 0.837 |
| Sn1  | O29   | 2.201(7) | 0.494 | Sn2  | O5       | 2.304(7) | 0.374 |
| Sn1  | O40   | 2.228(6) | 0.459 | Sn2  | O9       | 2.377(6) | 0.307 |
|      |       |          |       | Sn2  | O23      | 2.422(7) | 0.272 |
| Sn3  | 2.486 |          |       | Sn4  | 1.699    |          |       |
| Sn3  | Cl2   | 2.454(5) | 0.888 | Sn4  | O6       | 2.186(8) | 0.514 |
| Sn3  | Cl3   | 2.460(5) | 0.874 | Sn4  | O32      | 2.181(7) | 0.521 |
| Sn3  | Cl7   | 2.529(6) | 0.725 | Sn4  | O43      | 2.092(9) | 0.663 |
| Sn5  | 2.310 |          |       | Sn6  | 1.722    |          |       |
| Sn5  | Cl6   | 2.464(3) | 0.864 | Sn6  | O18      | 2.102(8) | 0.645 |
| Sn5  | Cl8   | 2.532(4) | 0.719 | Sn6  | O45      | 2.167(8) | 0.541 |
| Sn5  | O18   | 2.058(7) | 0.727 | Sn6  | O48      | 2.171(7) | 0.536 |
| Sn7  | 2.243 |          |       |      |          |          |       |
| Sn7  | Cl5   | 2.549(5) | 0.687 |      |          |          |       |
| Sn7  | Cl9   | 2.470(3) | 0.850 |      |          |          |       |
| Sn7  | O43   | 2.069(7) | 0.706 |      |          |          |       |

**Table S10** Bond valence sum values for bridging oxygen atoms in **TOC-63**.

|     |       |     |       |     |       |     |       |     |       |
|-----|-------|-----|-------|-----|-------|-----|-------|-----|-------|
| O1  | 1.998 | O2  | 1.957 | O5  | 2.091 | O7  | 1.946 | O9  | 2.077 |
| O11 | 2.073 | O12 | 1.995 | O17 | 2.018 | O18 | 1.891 | O20 | 1.989 |
| O23 | 2.041 | O24 | 2.051 | O29 | 2.095 | O31 | 1.995 | O32 | 2.089 |
| O34 | 1.988 | O36 | 2.062 | O40 | 2.072 | O43 | 1.891 | O46 | 2.072 |
| O47 | 2.004 | O48 | 2.098 | O53 | 1.973 |     |       |     |       |



### 3. Additional structural pictures

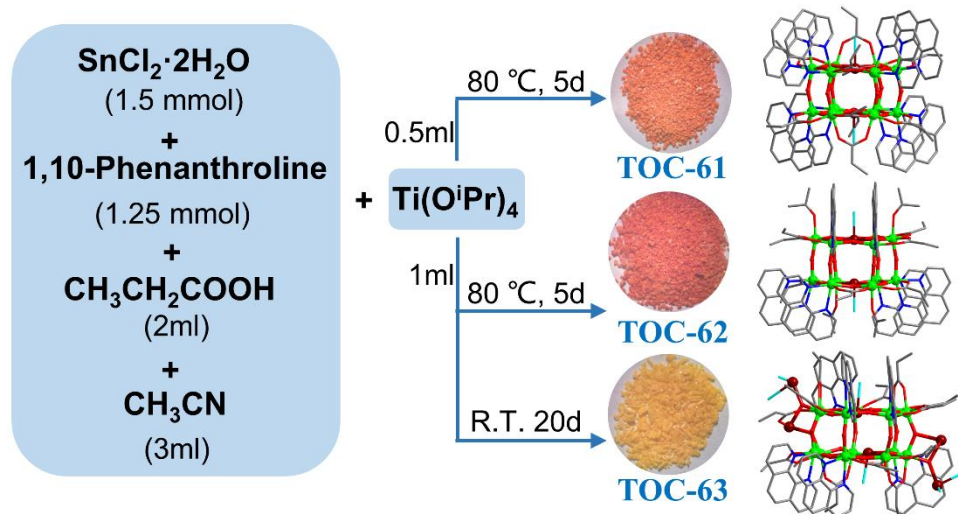

Figure S1 Synthetic route to three compounds.

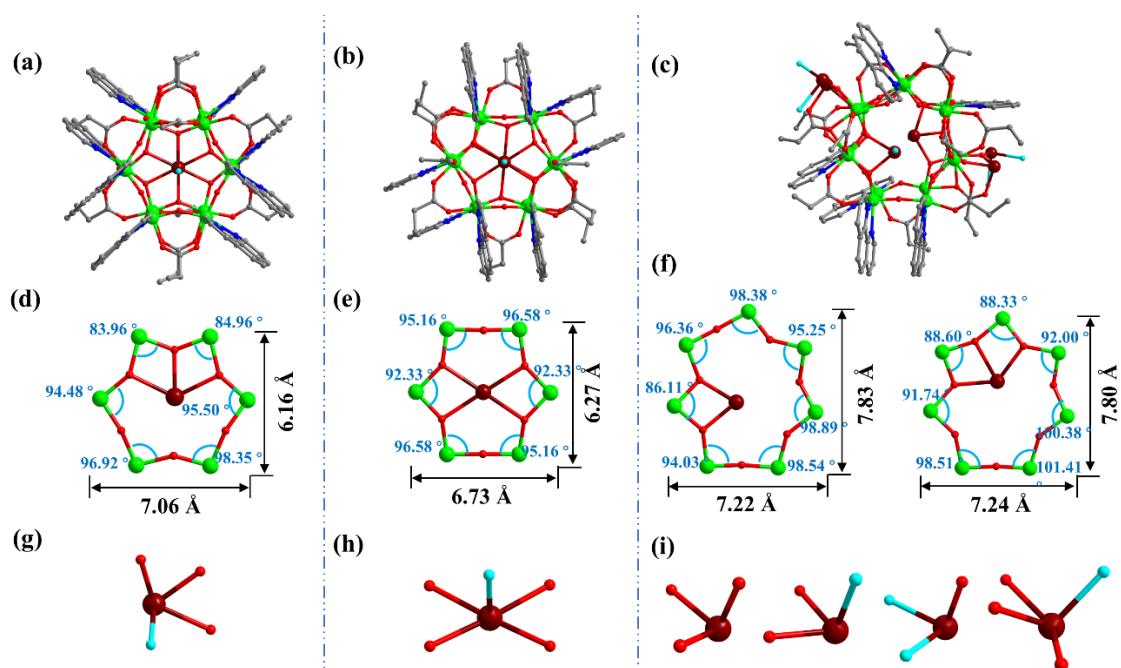

Figure S2 Top views of the total molecular structure of TOC-61 (a), TOC-62 (b), TOC-63 (c). Detail drawing of TOC-61 (d), TOC-62 (e), TOC-63 (f). The Coordination environment diagram of  $\text{Sn}^{2+}$  in TOC-61 (g), TOC-62 (h), TOC-63 (i).

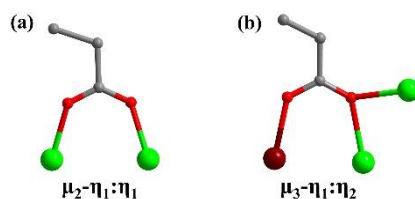

Figure S3 The coordination modes of propionic acid ligand in TOC-63.

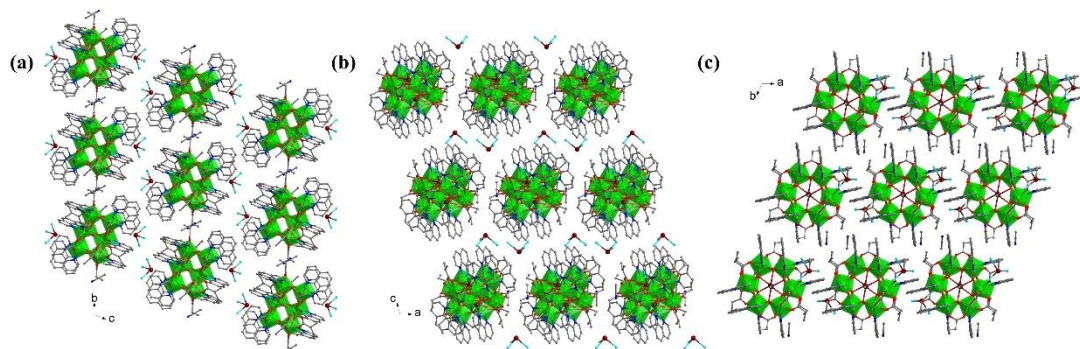

**Figure S4** Packing diagrams of **TOC-61** in the view of (a) a-axis, (b) b-axis and (c) c-axis.

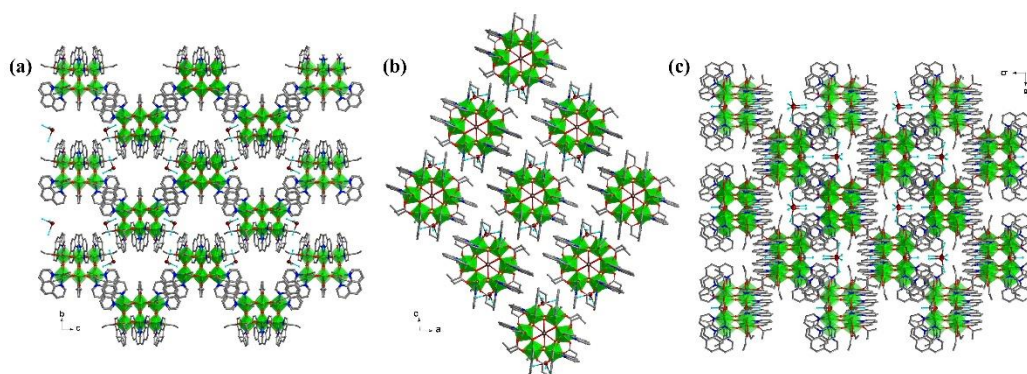

**Figure S5** Packing diagrams of **TOC-62** in the view of (a) a-axis, (b) b-axis and (c) c-axis.

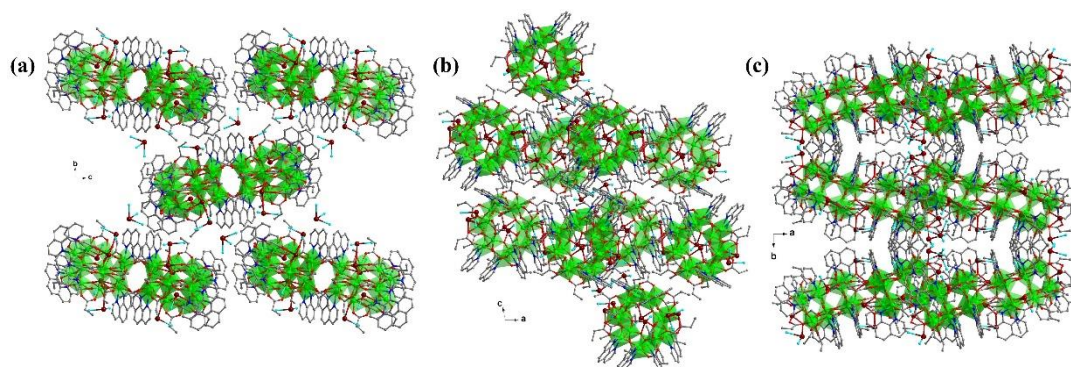

**Figure S6** Packing diagrams of **TOC-63** in the view of (a) a-axis, (b) b-axis and (c) c-axis.

## 4. Powder-XRD patterns

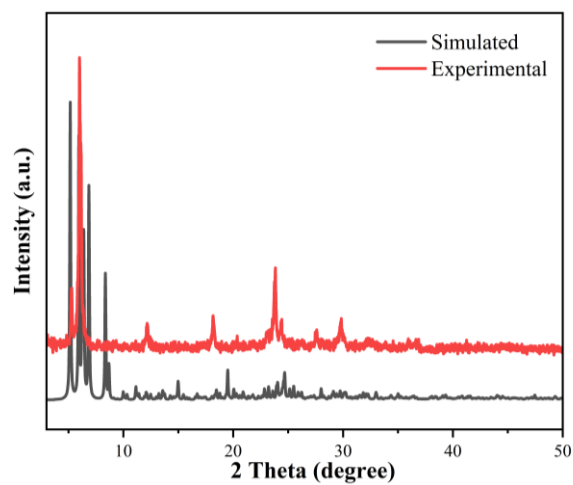

**Figure S7** Simulated and experimental PXRD patterns of TOC-61.

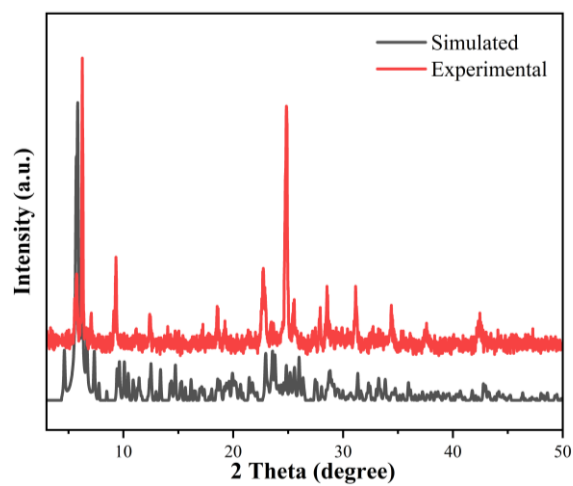

**Figure S8** Simulated and experimental PXRD patterns of TOC-62.

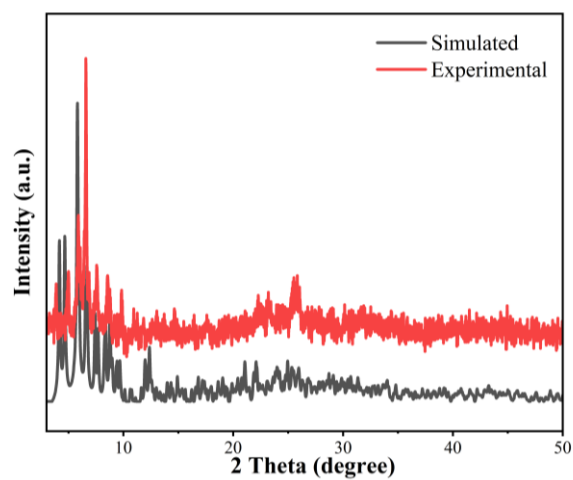

**Figure S9** Simulated and experimental PXRD patterns of TOC-63.

## 5. The energy dispersive X-ray spectroscopy (EDS) spectra

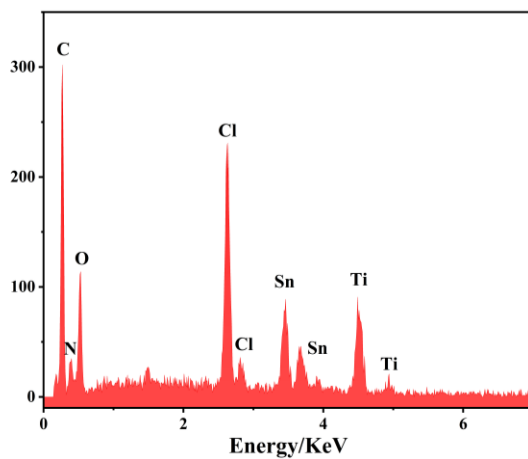

Figure S10 The EDS spectrum of TOC-61.

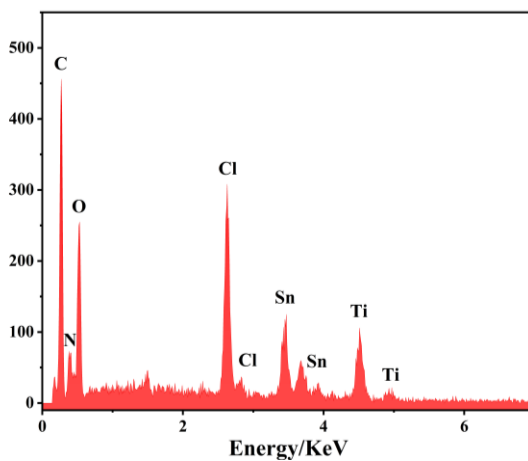

Figure S11 The EDS spectrum of TOC-62.

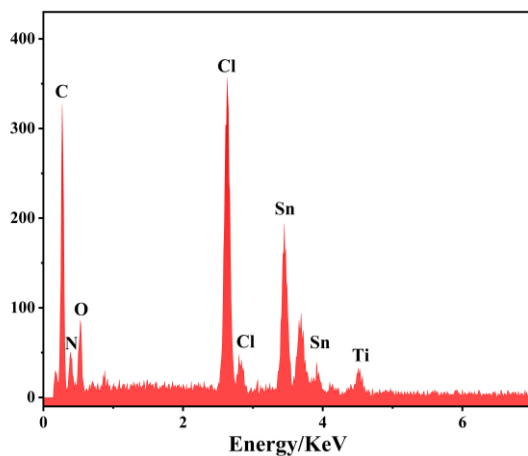

Figure S12 The EDS spectrum of TOC-63.

## 6. Thermogravimetical analysis (TG)

By analyzing the TG curves of **TOC-61** to **TOC-63**, it was observed that the skeleton of the three compounds remained relatively stable until  $\sim 200$  °C. Beyond this temperature, ligand detachment and structure decomposition occurred.

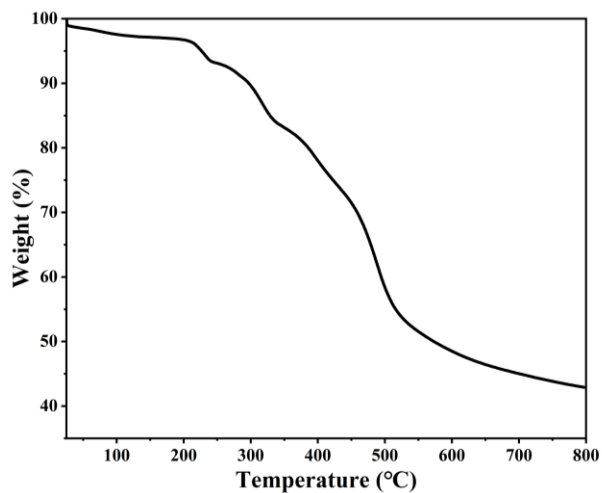

Figure S13 TG curve of **TOC-61** in N<sub>2</sub> atmosphere.

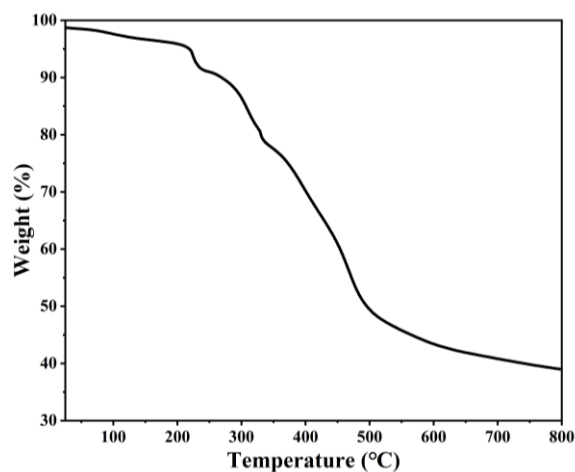

Figure S14 TG curve of **TOC-62** in N<sub>2</sub> atmosphere.

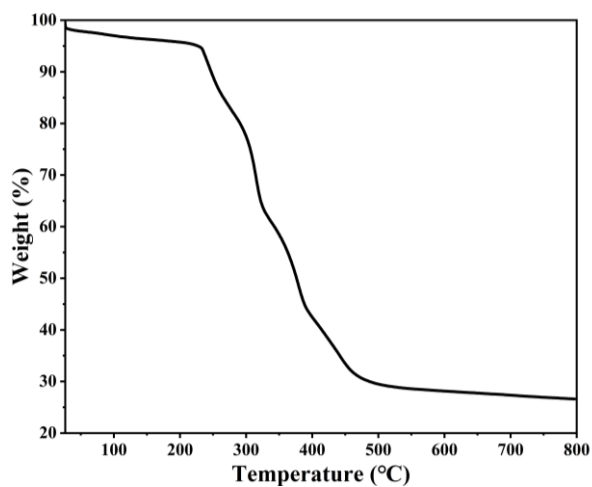

Figure S15 TG curve of **TOC-63** in N<sub>2</sub> atmosphere.

## 7. IR spectra

The band around 3300~2800  $\text{cm}^{-1}$  is attributed to  $\nu(\text{C-H})$ . The incorporation of 1,10-phenanthroline is supported by the C-H vibration at 3100~3010  $\text{cm}^{-1}$ , and the absorption peak in the range of 1750~1410  $\text{cm}^{-1}$  belongs to the stretching vibration of C=O on the carboxyl group. The absorption peak below 1000  $\text{cm}^{-1}$  is associated with  $\nu(\text{M-O-M})$ .

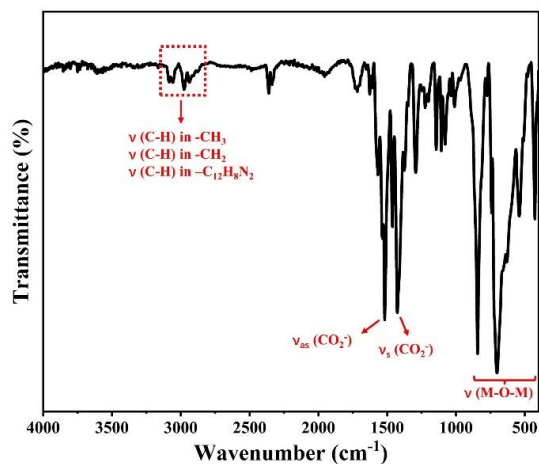

Figure S16 FT-IR spectrum of TOC-61.

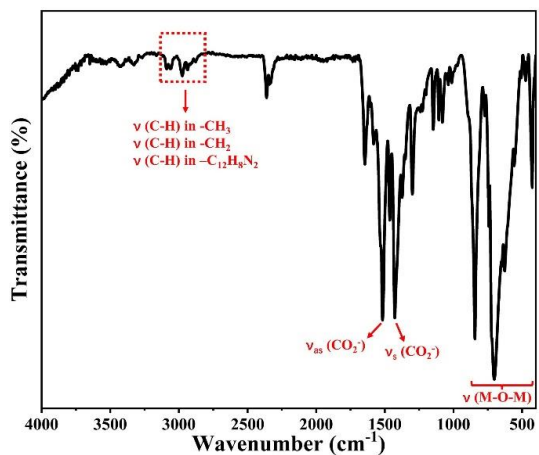

Figure S17 FT-IR spectrum of TOC-62.

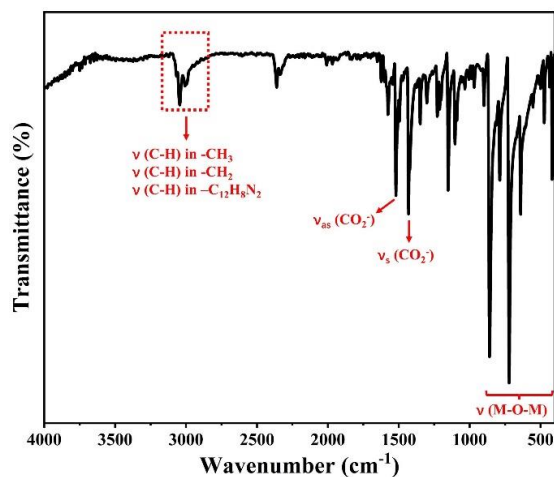

Figure S18 FT-IR spectrum of TOC-63.

## 8. XPS spectra

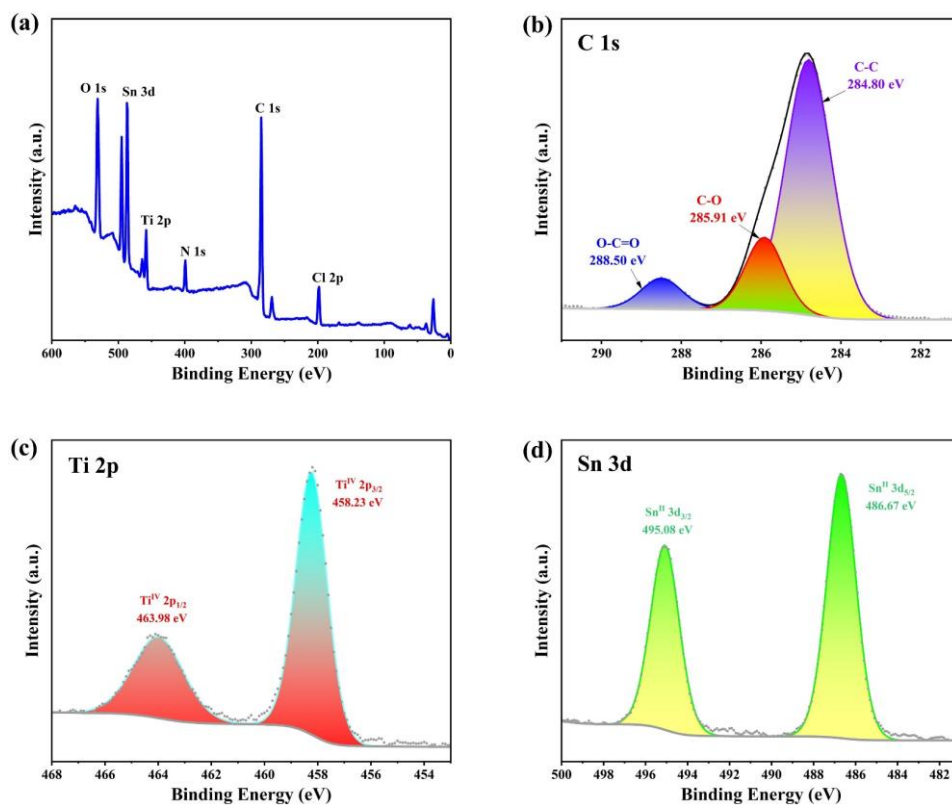

Figure S19 XPS spectra of TOC-61.

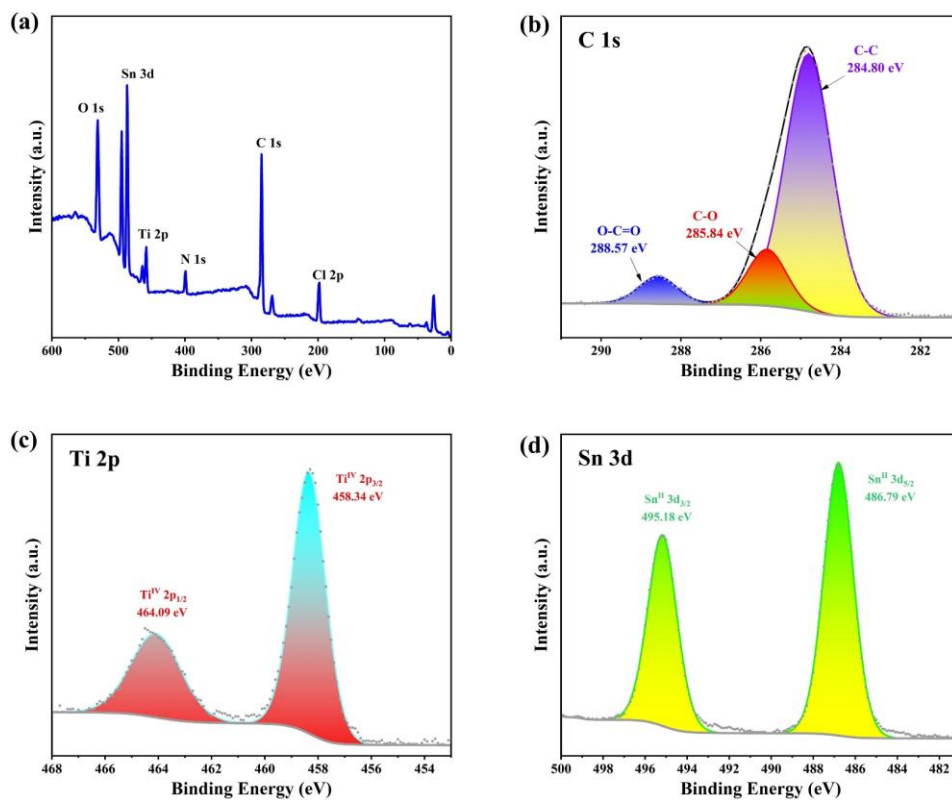

Figure S20 XPS spectra of TOC-62.

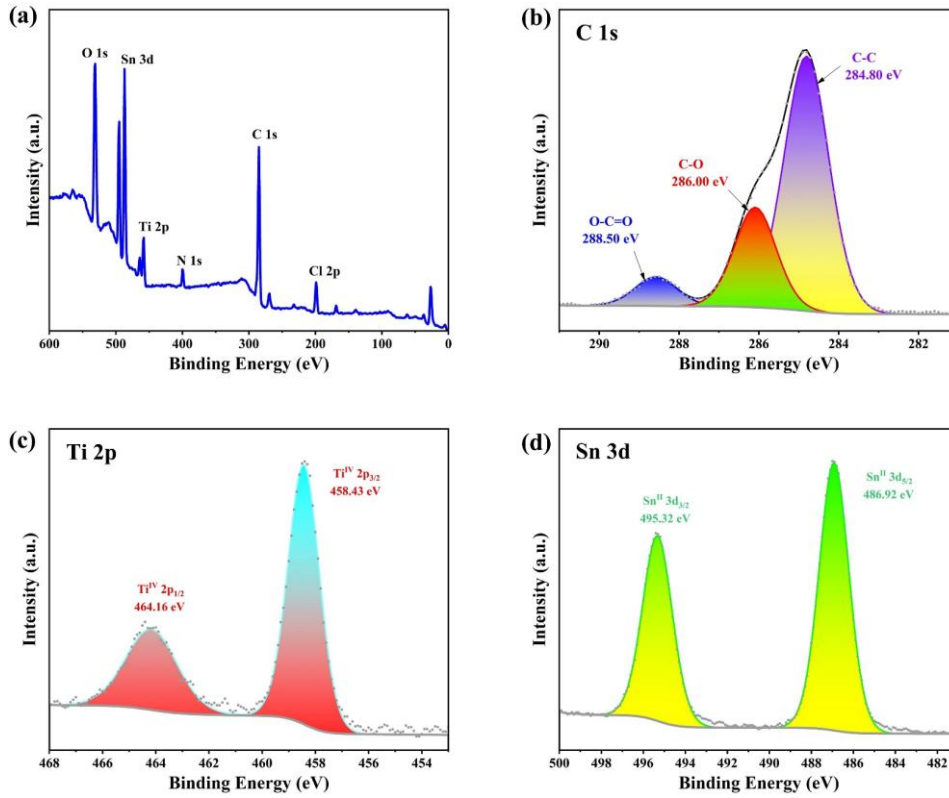

Figure S21 XPS spectra of TOC-63.

## 9. The NLO Property

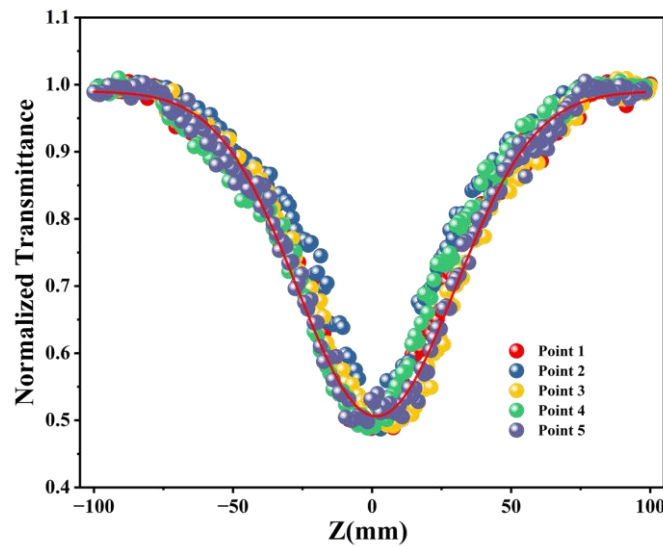

Figure S22 The open-aperture Z-scan results at 532 nm for TOC-61 thin film: the same thin film is tested at different points.



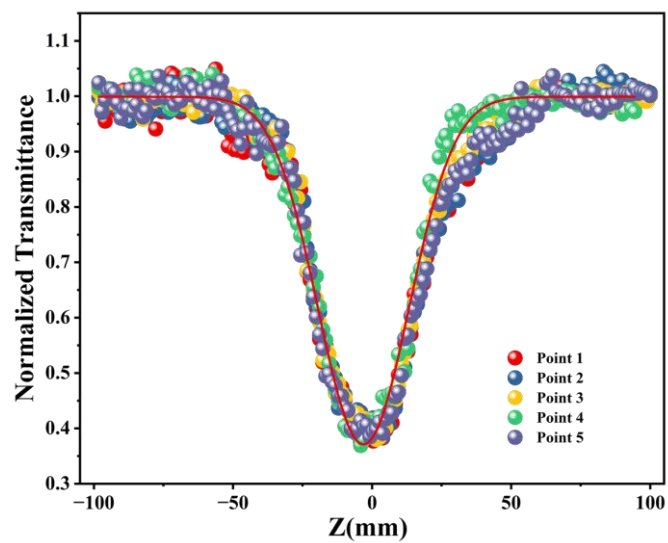

**Figure S23** The open-aperture Z-scan results at 532 nm for **TOC-62** thin film: the same thin film is tested at different points.

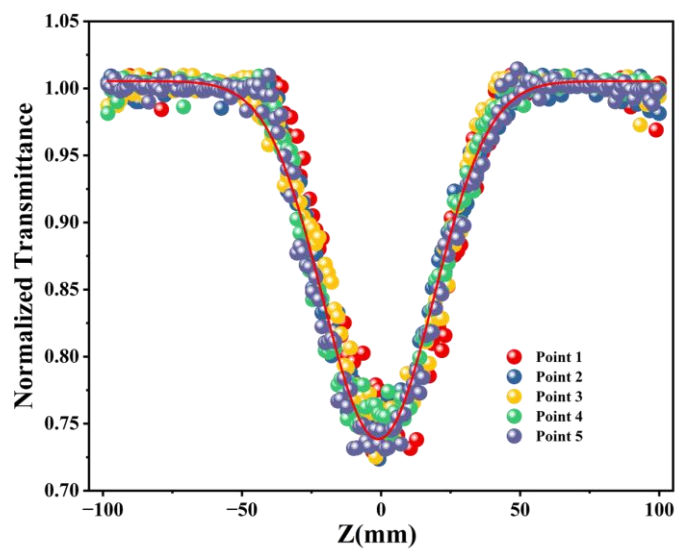

**Figure S24** The open-aperture Z-scan results at 532 nm for **TOC-63** thin film: the same thin film is tested at different points.

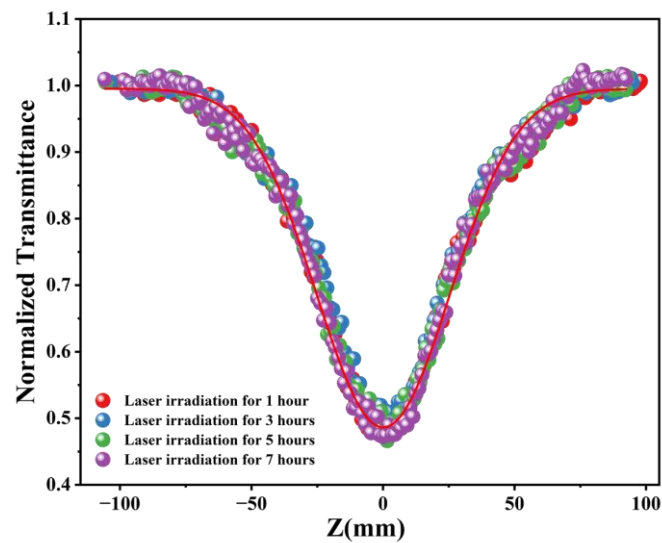

**Figure S25** The open-aperture Z-scan results at 532 nm for **TOC-61** thin film: the same thin film is tested for different laser irradiation times at the same point.

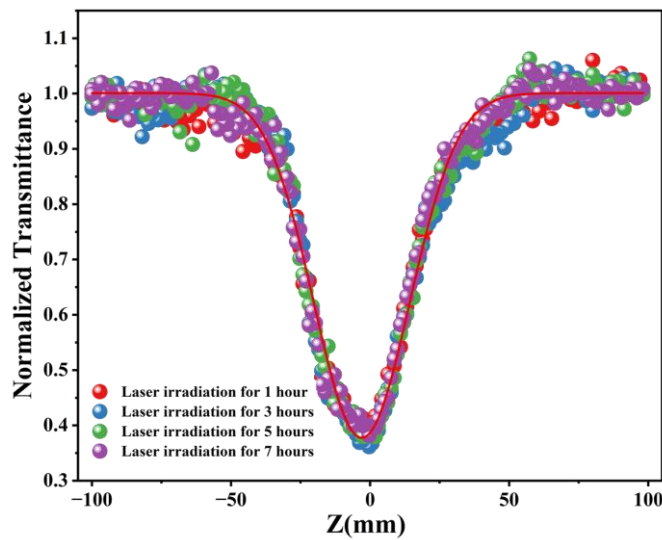

**Figure S26** The open-aperture Z-scan results at 532 nm for **TOC-62** thin film: the same thin film is tested for different laser irradiation times at the same point.

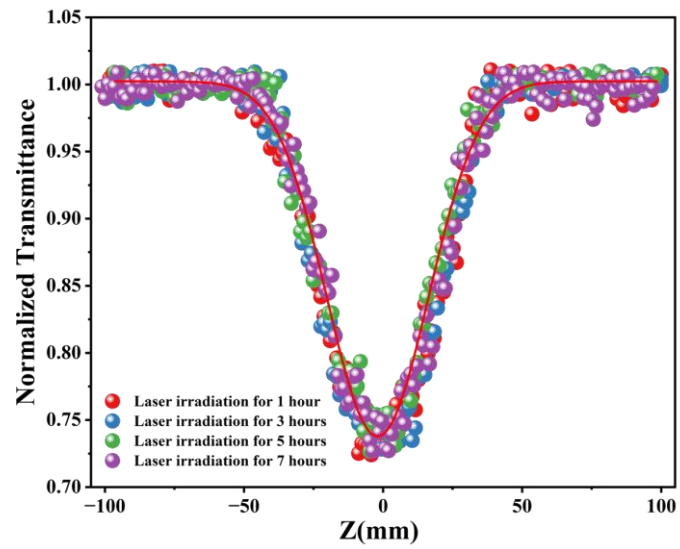

**Figure S27** The open-aperture Z-scan results at 532 nm for **TOC-63** thin film: the same thin film is tested for different laser irradiation times at the same point.
